# Supplementary material
Source: PubMed Central journal article supplement (PMC2767095)

**Bison**

**P**

**P1**

**P2**

**P3**

**AvrP123**

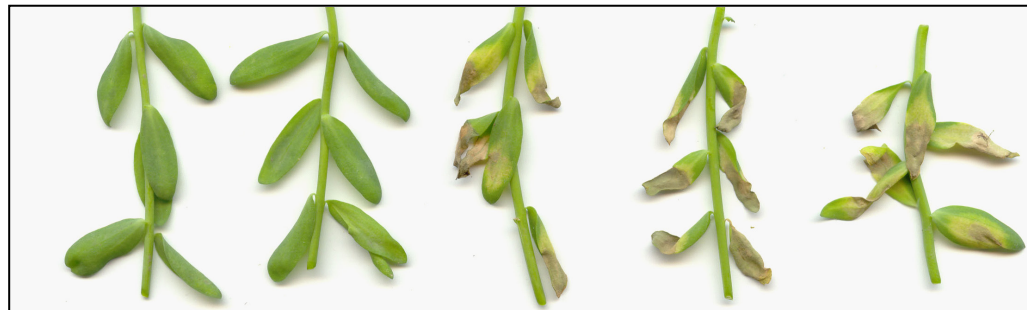

**AvrP**

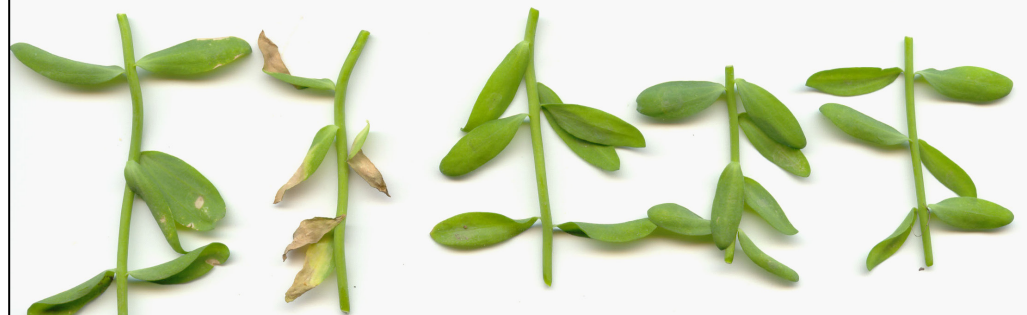

**A**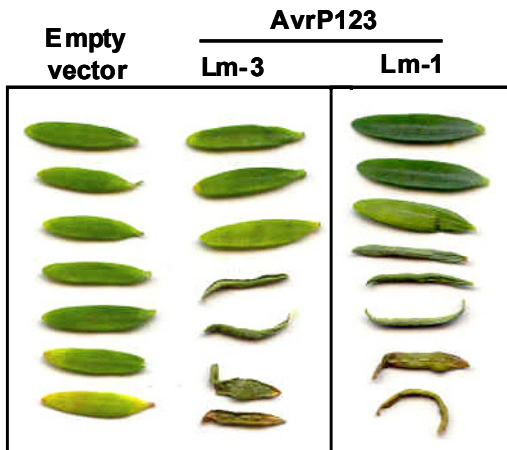**B**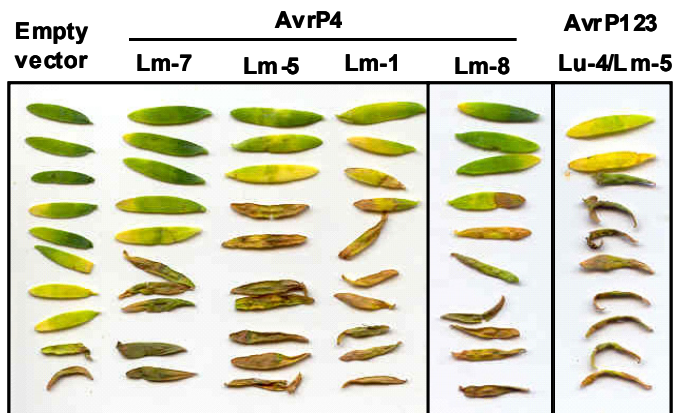

Supplement: msp166_1.pdf [file msp166_1.pdf]
